# Supplementary material for: Design and Selection of a Camelid Single-Chain Antibody Yeast Two-Hybrid Library Produced De Novo for the Cap Protein of Porcine Circovirus Type 2 (PCV2)
Source: PLOS journal article supplement (doi:10.1371/journal.pone.0056222), 2013-03-01
Supplement: S4 (10.1371/journal.pone.0056222.s004) [file journal.pone.0056222.s004]

**Table S3.**

**Table S3. The co-transformation results of yeast two-hybrid (refer to Fig. 4)**

| Sample Group | Bait （pGBKT7） DNA-BD | Prey （pGADT7） AD | Growth on DDO/X/A | Color | Growth on QDO/X/A | Color |
| --- | --- | --- | --- | --- | --- | --- |
| Group A (Autoactivation test) | Empty vector | Empty vector | Yes | White | No | － |
| Cap | Empty vector | Yes | White | No | － |
| Group B-M  (Cap-VHH interaction) | Empty vector | VHH | Yes | White | No | － |
| Cap | VHH | Yes | Blue | Yes | Blue |
| Group N  (53*/T* positive control)  (Lam#/T# negative control) | 53* | T* | Yes | Blue | Yes | Blue |
| Lam# | T# | Yes | White | No | － |

In all cases, only the co-transformants of positive interactions showed blue color and grew on both DDO/X/A and QDO/X/A plates. The co-transformants without autoactivation or negative interactions only growth on DDO/X/A plate and showed white. The positive interactions were showed in shadowed boxes. *positive control. # negative control.
